# Supplementary material
Source: publisher figshare collection journal article supplement (https://acs.figshare.com/ndownloader/files/3904504)
Supplement: Supplementary file 1 [file 3904504]

Supporting information for

Multidentate Ionic Surfactant Mediated Extraction  
and Dispersion of Gold Nanoparticles in Organic  
Solvents

*Sangbum Han and Ramjee Balasubramanian\**

Department of Chemistry and Biochemistry, Old Dominion University, Norfolk, VA 23529.

**Corresponding Author**

\* Email: [bramjee@odu.edu](mailto:bramjee@odu.edu).

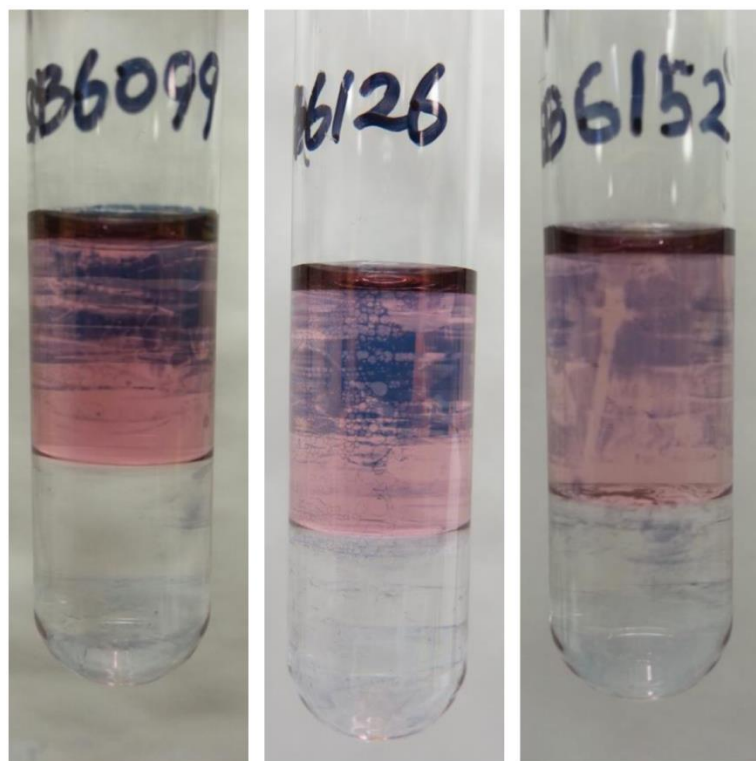

**Figure S1.** Photographs of various batches of 18 nm gold nanoparticles extracted with resorcinarene **3**.

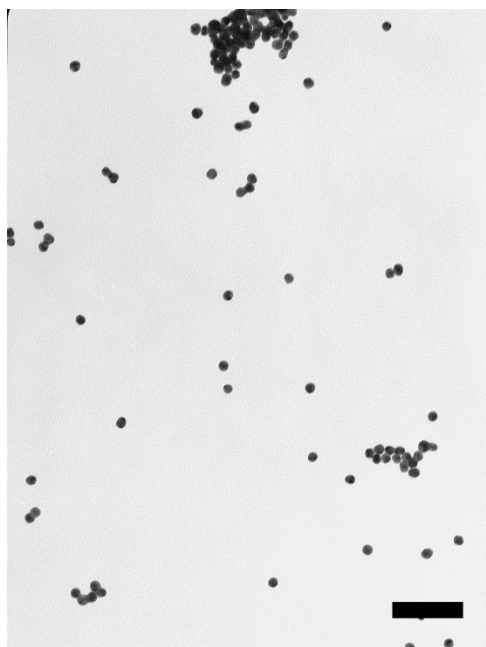

**Figure S2.** TEM image (scale bar = 100 nm) of 18 nm citrate stabilized gold nanoparticles.

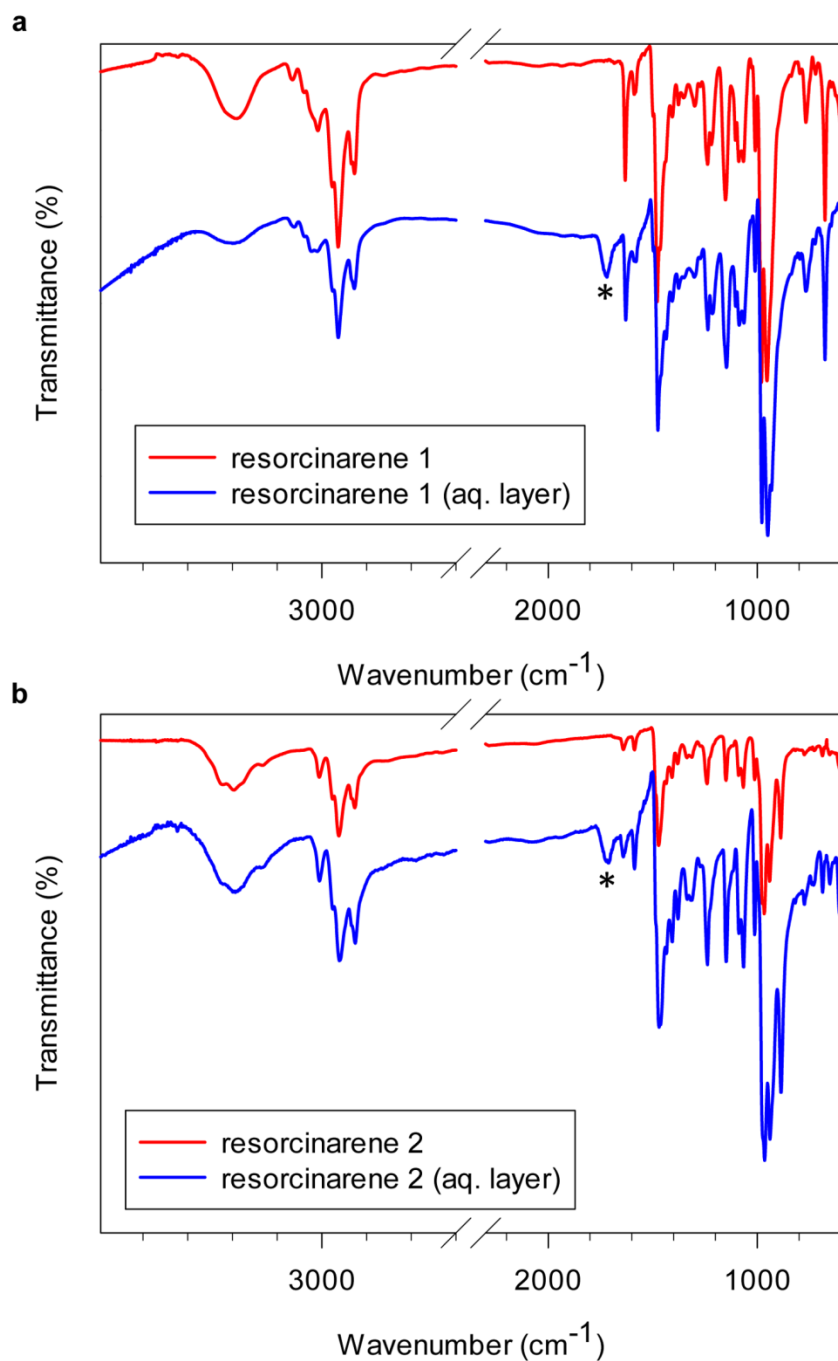

**Figure S3.** FTIR spectra of resorcinarenes **1** (a) and **2** (b) and the compounds recovered from the aqueous (aq.) layer after the extraction of the nanoparticles into organic phase. *Note that the peak marked with \* around  $\sim 1720\text{ cm}^{-1}$  observed in the recovered compounds could be from the protonation of citrate.*

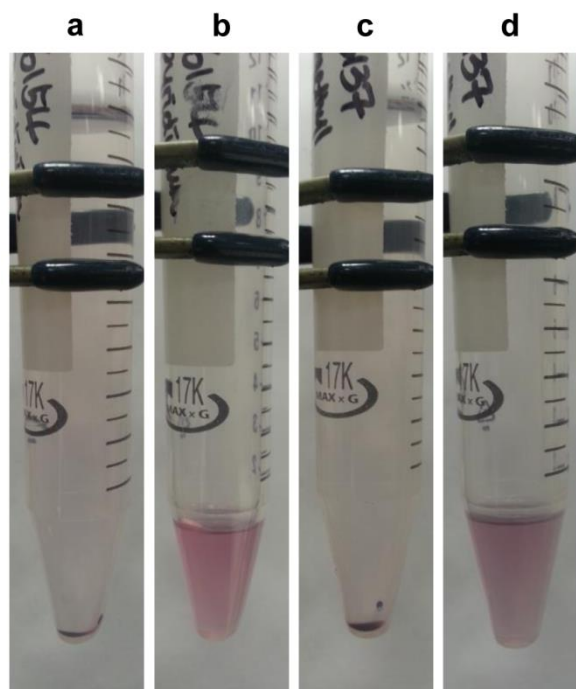

**Figure S4.** Photographs of precipitated (a and c) and redispersed nanoparticles (b and d) extracted by resorcinarene **1** (a and b) and **2** (c and d).

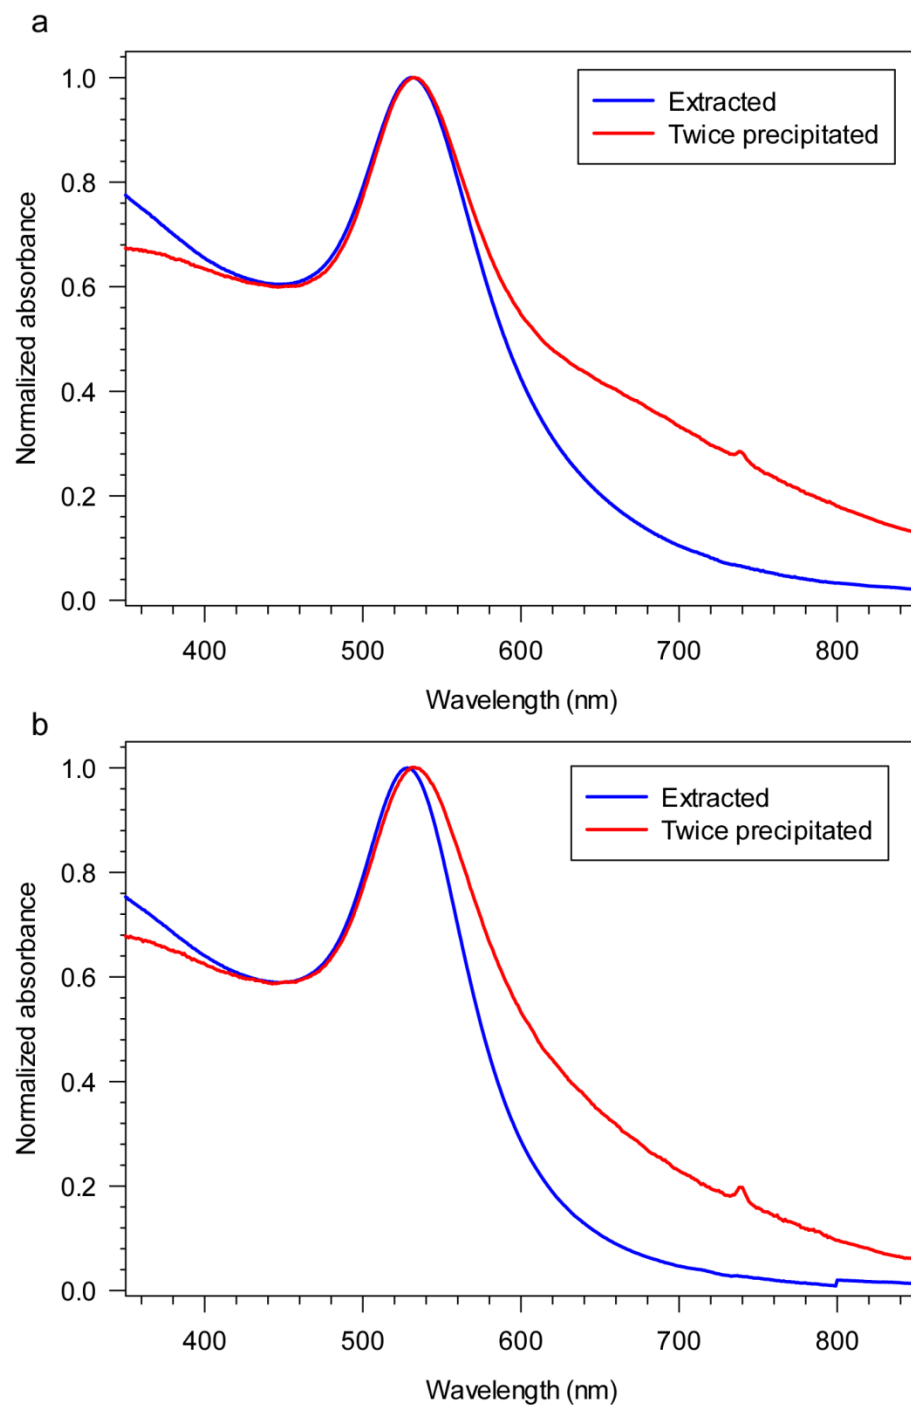

**Figure S5.** UV-vis spectra of nanoparticles extracted into toluene-acetonitrile mixture by resorcinarene **1** (a) and **2** (b) and nanoparticles twice precipitated and redispersed in chloroform.

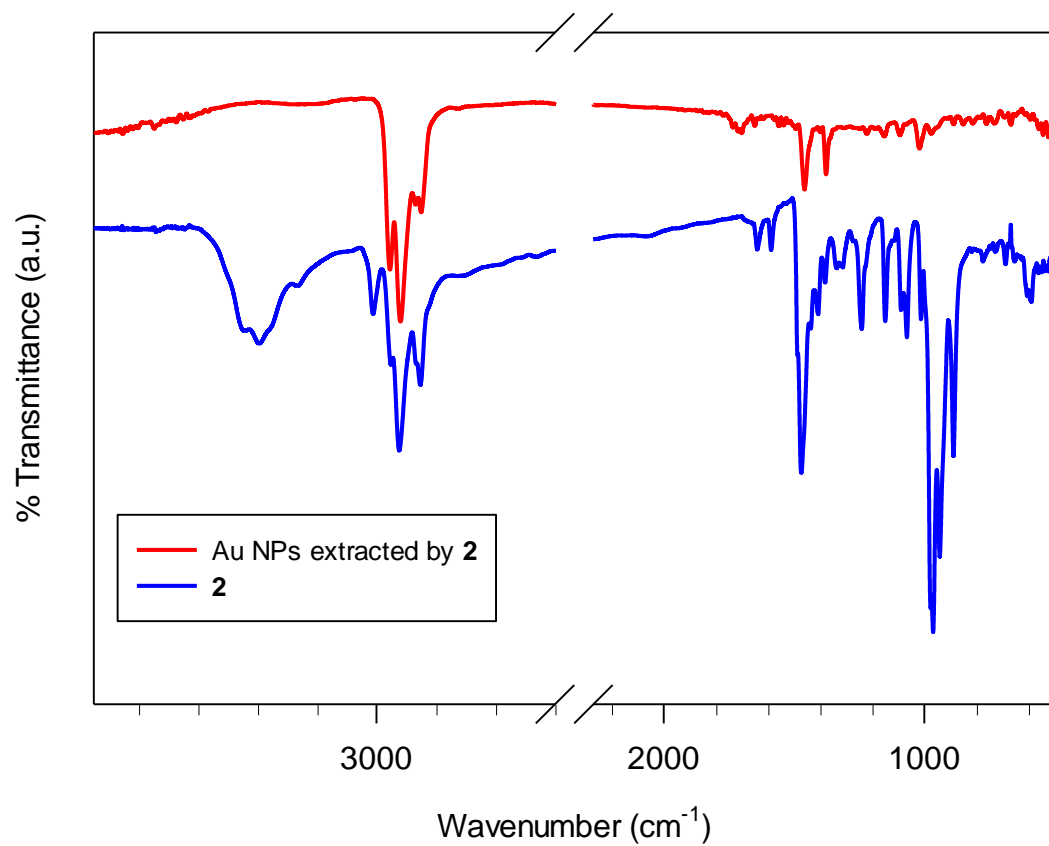

**Figure S6.** IR spectra of 18 nm gold nanoparticles extracted by **2** (twice precipitated) and **2**. **2** was drop cast from methanol.

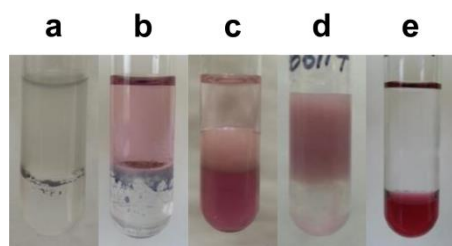

**Figure S7.** Extraction experiments carried out with 18 nm gold nanoparticles in the presence of (a) CTAB in toluene-acetonitrile (b) reduced concentration of resorcinarene **2** in toluene-acetonitrile (c) resorcinarene **2** in toluene-acetonitrile in the presence of acetic acid (d) resorcinarene **2** in water-toluene system in the absence of acetonitrile and (e) resorcinarene **2** in chloroform-methanol.



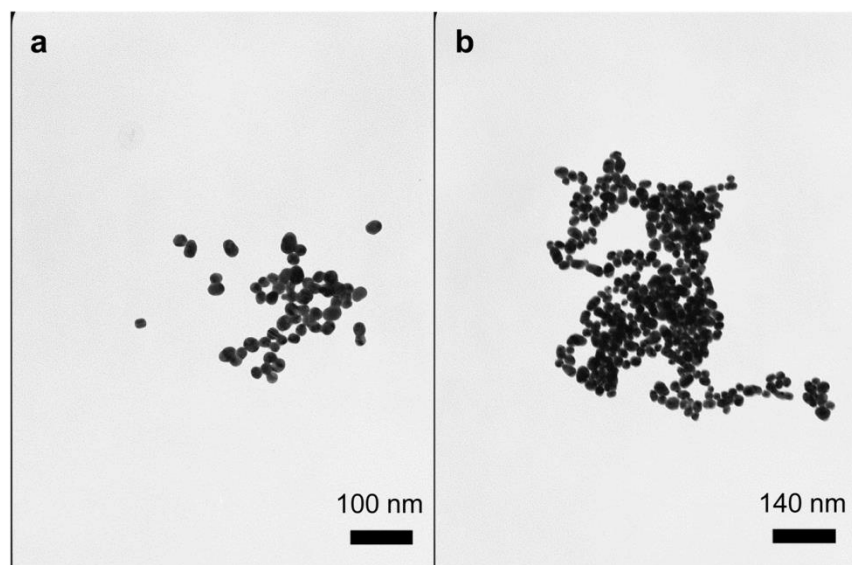

**Figure S8.** TEM image of  $23 \pm 3$  nm (a) and  $29 \pm 8$  nm (b) citrate stabilized gold nanoparticles.

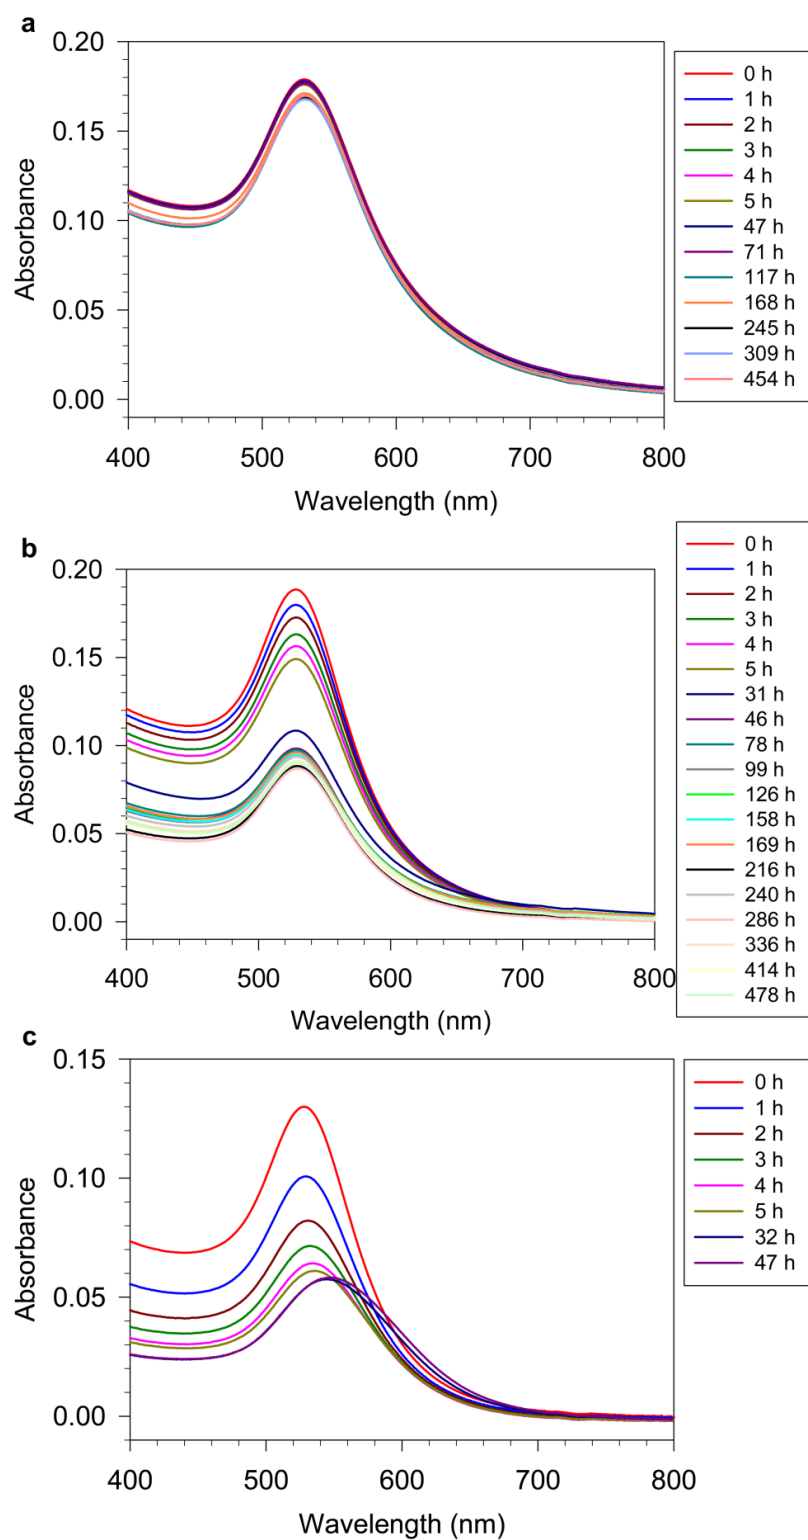

**Figure S9.** UV-vis spectra of gold nanoparticles (18 nm) extracted by (a) **1** (b) **2** and (c) **3** at various time periods.

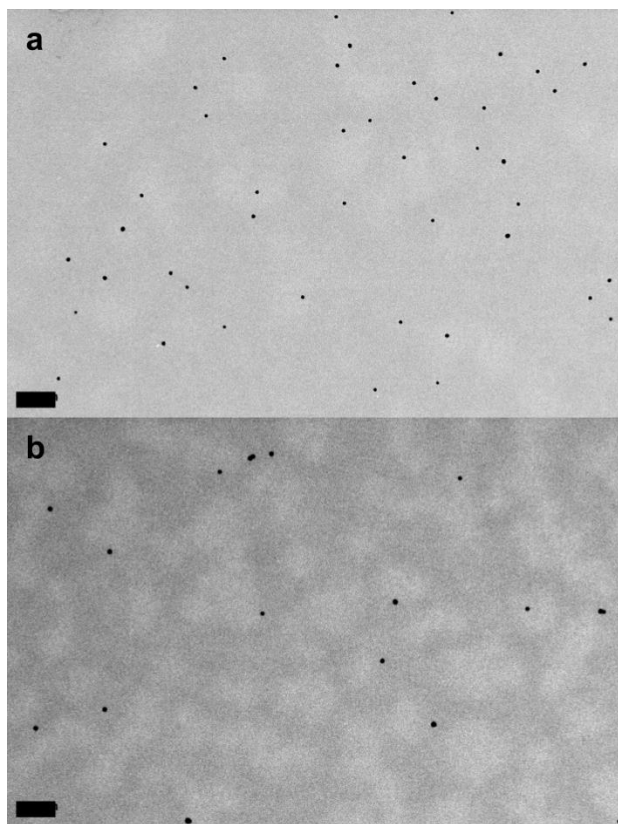

**Figure S10.** TEM image (scale bar = 200 nm) of 18 nm gold nanoparticles extracted by (a) **1** (~312 h) and (b) **2** (after 480 h).
